# Supplementary material for: Proving Surface Plasmons in Graphene Nanoribbons Organized as 2D Periodic Arrays and Potential Applications in Biosensors
Source: MDPI journal article supplement (doi:10.3390/chemosensors10120514), 2022-12-03
Supplement: s1 [file s1]

Supplementary

# Proving Surface Plasmons in Graphene Nanoribbons Organized as 2D Periodic Arrays and Potential Applications in Biosensors

Talia Tene <sup>1</sup>, Marco Guevara <sup>2</sup>, Jiří Svozilík <sup>3,4</sup>, Diana Coello-Fiallos <sup>5</sup>, Jorge Briceño <sup>6</sup>  
and Cristian Vacacela Gomez <sup>7,\*</sup>

<sup>1</sup> Department of Chemistry, Universidad Técnica Particular de Loja, Loja 110160, Ecuador

<sup>2</sup> Faculty of Mechanical Engineering, Escuela Superior Politécnica de Chimborazo (ESPOCH), Riobamba 060155, Ecuador

<sup>3</sup> Facultad de Ciencias, Escuela Superior Politécnica de Chimborazo (ESPOCH), Riobamba 060155, Ecuador

<sup>4</sup> Joint Laboratory of Optics of Palacký University and Institute of Physics of CAS, Faculty of Science, Palacký University, 17 listopadu 12, 771 46 Olomouc, Czech Republic

<sup>5</sup> Surface Nanoscience Group, Department of Physics, University of Calabria, Via P. Bucci, Cubo 33C, I-87036 Rende, Italy

<sup>6</sup> Dirección de Investigación y Vinculación, Universidad Estatal de Bolívar, Av. Ernesto Ché Guevara y Gabriel Secaira, CP. Guaranda 020150, Ecuador

<sup>7</sup> UNICARIBE Research Center, University of Calabria, I-87036 Rende, Italy

\* Correspondence: cristianisaac.vacacelagomez@fis.unical.it

## 1. Supplementary Figures

**Citation:** Tene, T.; Guevara, M.; Svozilík, J.; Coello-Fiallos, D.; Briceño, J.; Gomez, C.V. Proving Surface Plasmons in Graphene Nanoribbons Organized as 2D Periodic Arrays and Potential Applications in Biosensors. *Chemosensors* **2022**, *10*, 514. <https://doi.org/10.3390/chemosensors10120514>

Academic Editors: Iolanda Cruz Vieira, Edson Roberto Santana and João Paulo Winiarski

Received: 24 October 2022

Accepted: 30 November 2022

Published: 3 December 2022

**Publisher's Note:** MDPI stays neutral with regard to jurisdictional claims in published maps and institutional affiliations.

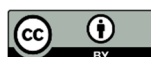

**Copyright:** © 2022 by the authors. Licensee MDPI, Basel, Switzerland. This article is an open access article distributed under the terms and conditions of the Creative Commons Attribution (CC BY) license (<https://creativecommons.org/licenses/by/4.0/>).

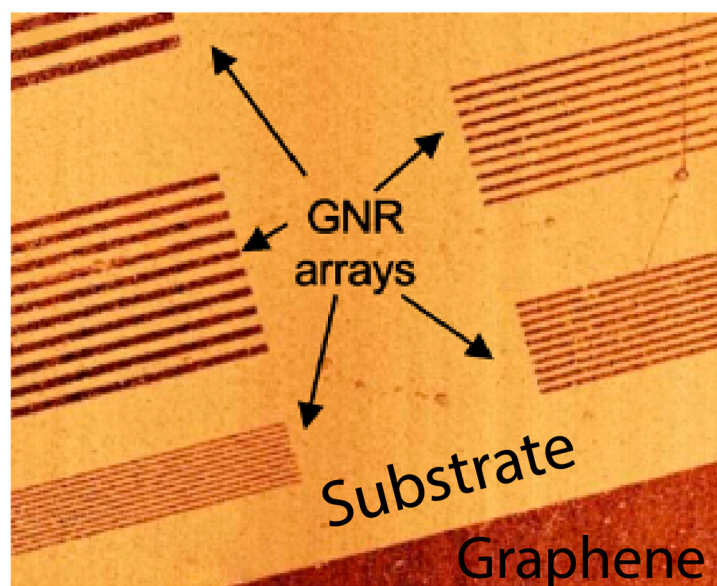

**Figure S1.** Experimentally realized graphene nanoribbons organized as 2D periodic arrays (Ref. [1]).

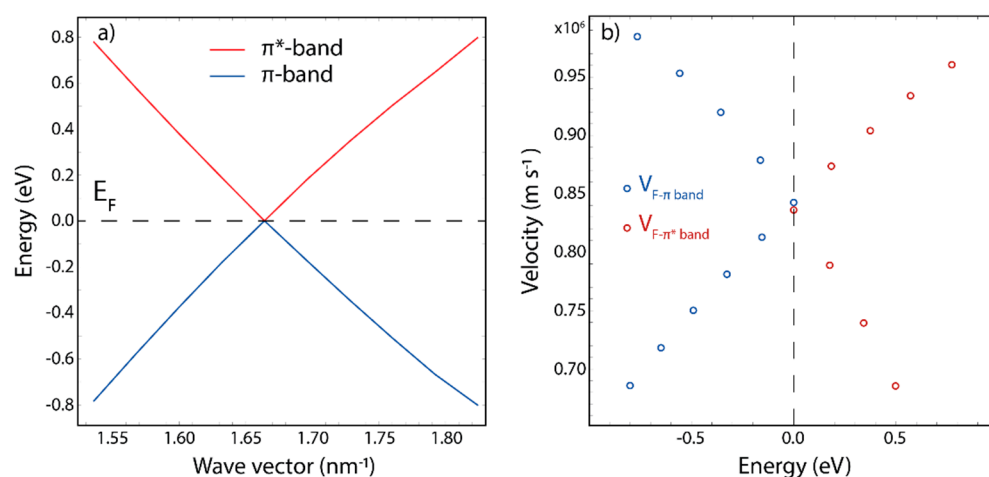

**Figure S2.** (a) Band structure of graphene in the vicinity of K point with the Fermi level set to zero energy. The blue line is the  $\pi$  band and the red line is the  $\pi^*$  band. (b) Fermi velocity as a function of the single-particle energy for the  $\pi$  band (blue circles) and the  $\pi^*$  band (darker red circles) in the  $k$ -point region.

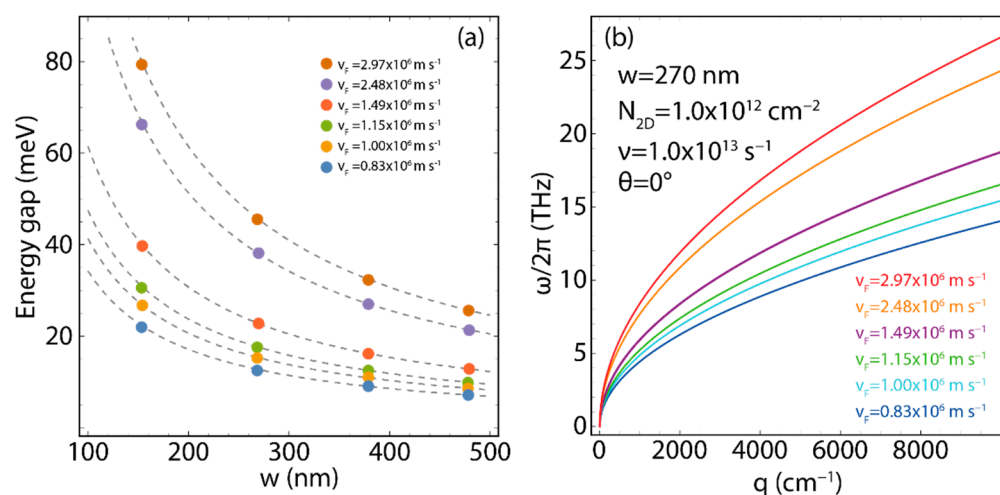

**Figure S3.** (a) Bandgap ( $\Delta$ ) as a function of the ribbon width ( $w$ ). Markers represent the GNR systems under study and the dashed lines are the fitting curve using Equation 2. The numerical values of the bandgap are calculated using different charge carrier velocities as reported in Ref. [2]. (b) Plasmon frequency dispersion ( $\omega/2\pi$ ) vs. wave vector ( $q$ ) for 2D GNR arrays of  $w = 270$  nm wide. The parameters of Equation 4 have been fixed as:  $N_{2D} = 1.0 \times 10^{12} \text{ cm}^{-2}$ ,  $\theta = 0$ ,  $v = 1.0 \times 10^{13} \text{ s}^{-1}$ , and different carrier velocities are considered.

## 2. Supplementary Tables

**Table S1.** Computed  $k$ -points and single-particle energies using LDA-DFT for the  $\pi$  and  $\pi^*$  bands close to the K point. Calculated Fermi velocity by Equation 2.

| $k$ -point (nm <sup>-1</sup> ) | $E_{\pi\text{-band}}$ (eV) | $V_F$ (cm/s) 10 <sup>8</sup> | $E_{\pi^*\text{-band}}$ (eV) | $V_F$ (cm/s) 10 <sup>8</sup> |
|--------------------------------|----------------------------|------------------------------|------------------------------|------------------------------|
| 1.536                          | −0.765                     | 0.985                        | 0.796                        | 0.960                        |
| 1.568                          | −0.557                     | 0.953                        | 0.593                        | 0.934                        |
| 1.600                          | −0.357                     | 0.920                        | 0.397                        | 0.904                        |
| 1.632                          | −0.163                     | 0.879                        | 0.206                        | 0.874                        |
| 1.664                          | 0.022                      | 0.842                        | 0.022                        | 0.836                        |
| 1.696                          | −0.155                     | 0.813                        | 0.198                        | 0.789                        |
| 1.728                          | −0.327                     | 0.781                        | 0.364                        | 0.739                        |
| 1.760                          | −0.491                     | 0.750                        | 0.520                        | 0.685                        |
| 1.792                          | −0.649                     | 0.718                        | 0.664                        | 0.632                        |
| 1.824                          | −0.800                     | 0.686                        | 0.797                        | 0.577                        |

**Table S2.** Bandgap and charge carrier effective mass of GNRs with ribbon width:  $w = 155, 270, 380, 480$  nm. The free-electron mass is denoted as  $m_0$ . The charge carrier velocity is  $v_F = 0.829 \times 10^6$  m/s.

| Ribbon width (nm) | Bandgap (meV) | Effective mass ( $m^*$ ) $\times m_0$ |
|-------------------|---------------|---------------------------------------|
| 155               | 22.12         | $2.83 \times 10^{-3}$                 |
| 270               | 12.70         | $1.63 \times 10^{-3}$                 |
| 380               | 9.02          | $1.16 \times 10^{-3}$                 |
| 480               | 7.14          | $0.91 \times 10^{-3}$                 |

**Table S3.** Bandgap and charge carrier effective mass of GNRs with ribbon width:  $w = 155, 270, 380, 480$  nm. The free-electron mass is denoted as  $m_0$ . The charge carrier velocity is  $v_F \approx 1.0 \times 10^6$  m/s.

| Ribbon width (nm) | Bandgap (meV) | Effective mass ( $m^*$ ) $\times m_0$ |
|-------------------|---------------|---------------------------------------|
| 155               | 26.68         | $2.35 \times 10^{-3}$                 |
| 270               | 15.32         | $1.35 \times 10^{-3}$                 |
| 380               | 10.88         | $0.96 \times 10^{-3}$                 |
| 480               | 8.62          | $0.76 \times 10^{-3}$                 |

**Table S4.** Peak position of plasmon response in 2D GNR arrays of 155, 270, 380, and 480 nm wide, selecting three different  $q$  values ( $q = 100, 1000, 10,000$  cm<sup>-1</sup>).

| Ribbon width (nm) | $q_{100}$ (THz) | $q_{1000}$ (THz) | $q_{10,000}$ (THz) |
|-------------------|-----------------|------------------|--------------------|
| 155               | 1.03            | 3.35             | 10.63              |
| 270               | 1.38            | 4.43             | 14.03              |
| 380               | 1.64            | 5.26             | 16.65              |
| 480               | 1.85            | 5.91             | 18.71              |

**Table S5.** Percentage increase in plasmon frequency by increasing ribbon width for three different  $q$  values ( $q = 100, 1000, 10,000$  cm<sup>-1</sup>).

| Ribbon width (nm)     | $q_{100}$ (%) | $q_{1000}$ (%) | $q_{10,000}$ (%) |
|-----------------------|---------------|----------------|------------------|
| 150 $\rightarrow$ 270 | 25.36         | 24.38          | 26.16            |
| 270 $\rightarrow$ 380 | 15.85         | 15.78          | 15.74            |
| 380 $\rightarrow$ 480 | 11.35         | 11.00          | 11.01            |

**Table S6.** Peak position of plasmon response in 2D GNR arrays of 155, 270, 380, and 480 nm wide, for selected  $q$  values at  $\theta = 80$ .

|              | $w_{155}$ (THz) | $w_{270}$ (THz) | $w_{380}$ (THz) | $w_{480}$ (THz) |
|--------------|-----------------|-----------------|-----------------|-----------------|
| $q_{1000}$   |                 | 0.87            | 1.31            | 1.60            |
| $q_{2000}$   | 1.05            | 1.75            | 2.23            | 2.59            |
| $q_{3000}$   | 1.56            | 2.32            | 2.87            | 3.29            |
| $q_{4000}$   | 1.94            | 2.78            | 3.39            | 3.86            |
| $q_{5000}$   | 2.26            | 3.17            | 3.84            | 4.37            |
| $q_{6000}$   | 2.54            | 3.52            | 4.25            | 4.81            |
| $q_{7000}$   | 2.79            | 3.83            | 4.61            | 5.23            |
| $q_{8000}$   | 3.02            | 4.12            | 4.96            | 5.61            |
| $q_{9000}$   | 3.23            | 4.40            | 5.27            | 5.96            |
| $q_{10,000}$ | 3.43            | 4.65            | 5.58            | 6.30            |

**Table S7.** Percentage increase in plasmon frequency by increasing ribbon width for three different  $q$  values ( $q = 2000, 5000, 10,000 \text{ cm}^{-1}$ ) at  $\theta = 80$ .

| Ribbon width (nm)     | $q_{2000}$ (%) | $q_{5000}$ (%) | $q_{10,000}$ (%) |
|-----------------------|----------------|----------------|------------------|
| 150 $\rightarrow$ 270 | 39.85          | 28.71          | 26.24            |
| 270 $\rightarrow$ 380 | 21.52          | 17.45          | 16.67            |
| 380 $\rightarrow$ 480 | 13.90          | 12.13          | 11.43            |

**Table S8.** Peak position of plasmon response in 2D GNR arrays of 155, 270, 380, and 480 nm wide, for selected  $q$  values at  $\nu = 4.0 \times 10^{13} \text{ s}^{-1}$ .

|            | $w_{155}$ (THz) | $w_{270}$ (THz) | $w_{380}$ (THz) | $w_{480}$ (THz) |
|------------|-----------------|-----------------|-----------------|-----------------|
| $q_{100}$  |                 |                 |                 |                 |
| $q_{200}$  |                 |                 |                 | 0.86            |
| $q_{300}$  |                 |                 | 1.53            | 2.24            |
| $q_{400}$  |                 | 1.35            | 2.40            | 3.05            |
| $q_{500}$  |                 | 2.06            | 3.02            | 3.69            |
| $q_{600}$  | 0.69            | 2.58            | 3.54            | 4.23            |
| $q_{700}$  | 1.36            | 3.01            | 3.99            | 4.71            |
| $q_{800}$  | 1.80            | 3.39            | 4.40            | 5.15            |
| $q_{900}$  | 2.15            | 3.72            | 4.77            | 5.55            |
| $q_{1000}$ | 2.45            | 4.04            | 5.11            | 5.92            |

**Table S9.** Percentage increase in plasmon frequency by increasing ribbon width for three different  $q$  values ( $q = 600, 800, 1000 \text{ cm}^{-1}$ ) at  $\nu = 4.0 \times 10^{13} \text{ s}^{-1}$ .

| Ribbon width (nm)     | $q_{600}$ (%) | $q_{800}$ (%) | $q_{1000}$ (%) |
|-----------------------|---------------|---------------|----------------|
| 150 $\rightarrow$ 270 | 73.26         | 46.90         | 39.36          |
| 270 $\rightarrow$ 380 | 27.12         | 22.95         | 20.94          |
| 380 $\rightarrow$ 480 | 16.31         | 14.56         | 13.68          |

**Table S10.** Peak position of plasmon response in 2D GNR arrays of 155, 270, 380, and 480 nm wide, for selected  $q$  values at  $N_{2D} = 4.0 \times 10^{12} \text{ cm}^{-2}$ .

|              | $w_{155}$ (THz) | $w_{270}$ (THz) | $w_{380}$ (THz) | $w_{480}$ (THz) |
|--------------|-----------------|-----------------|-----------------|-----------------|
| $q_{1000}$   | 6.72            | 8.87            | 10.53           | 11.83           |
| $q_{2000}$   | 9.51            | 12.55           | 14.89           | 16.73           |
| $q_{3000}$   | 11.65           | 15.37           | 18.24           | 20.50           |
| $q_{4000}$   | 13.45           | 17.75           | 21.05           | 23.67           |
| $q_{5000}$   | 15.04           | 19.84           | 23.54           | 26.46           |
| $q_{6000}$   | 16.47           | 21.74           | 25.79           | 28.99           |
| $q_{7000}$   | 17.79           | 23.48           | 27.86           | 31.31           |
| $q_{8000}$   | 19.02           | 25.10           | 29.78           | 33.47           |
| $q_{9000}$   | 20.17           | 26.62           | 31.59           | 35.50           |
| $q_{10,000}$ | 21.26           | 28.06           | 33.29           | 37.42           |

**Table S11.** Percentage increase in plasmon frequency by increasing ribbon width for three different  $q$  values ( $q = 600, 800, 1000 \text{ cm}^{-1}$ ) at  $N_{2D} = 4.0 \times 10^{12} \text{ cm}^{-2}$ .

| Ribbon width (nm) | $q_{1000}$ (%) | $q_{5000}$ (%) | $q_{10,000}$ (%) |
|-------------------|----------------|----------------|------------------|
| 150 → 270         | 24.24          | 24.19          | 24.23            |
| 270 → 380         | 15.76          | 15.72          | 15.71            |
| 380 → 480         | 10.99          | 11.04          | 11.04            |

## References

1. Fei, Z.; Goldflam, M.D.; Wu, J.-S.; Dai, S.; Wagner, M.; McLeod, A.S.; Liu, M.K.; Post, K.W.; Zhu, S.; Janssen, G.; et al. Edge and Surface Plasmons in Graphene Nanoribbons. *Nano Lett.* **2015**, *15*, 8271–8276.
2. Hwang, C.; Siegel, D.A.; Mo, S.-K.; Regan, W.; Ismach, A.; Zhang, Y.; Zettl, A.; Lanzara, A. Fermi Velocity Engineering in Graphene by Substrate Modification. *Sci. Rep.* **2012**, *2*, 590.
